# Supplementary material for: “Lp⋯synthon” interaction as a reason for the strong amplification of synthon-forming hydrogen bonds
Source: Royal Society of Chemistry journal article supplement (doi:10.1039/c8ce01982g), 2019-01-01
Supplement: c8ce01982g1.pdf [file c8ce01982g1.pdf]

## “Lp...synthon” interaction as a reason for the strong amplification of the synthon-forming hydrogen bonds

Olga A. Lodochnikova,<sup>a,b</sup> \* Liliya Z. Latypova,<sup>b</sup> Timur I. Madzhidov,<sup>b</sup> Galina A. Chmutova,<sup>b</sup> Julia K. Voronina,<sup>a</sup> Aidar T. Gubaidullin,<sup>a</sup> Almira R. Kurbangalieva<sup>b</sup>

<sup>a</sup> Arbuzov Institute of Organic and Physical Chemistry, FRC Kazan Scientific Center of RAS, Arbuzov Street, 8, Kazan 420088, Russian Federation.  
E-mail: [lod\\_olga@mail.ru](mailto:lod_olga@mail.ru) (O.A.L.)

<sup>b</sup> A.M. Butlerov Institute of Chemistry, Kazan Federal University, Kremlyovskaya Street, 18, Kazan 420008, Russian Federation.

### Supplemental Materials

**Figure S1** Optimized geometry of different types of associates.

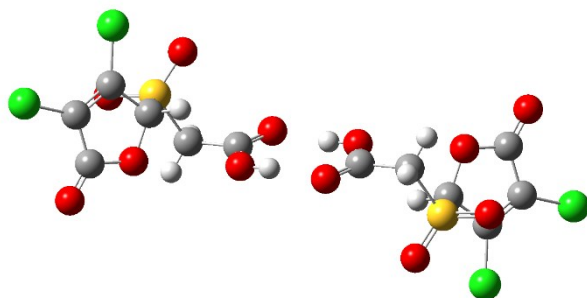

H-bonded dimer

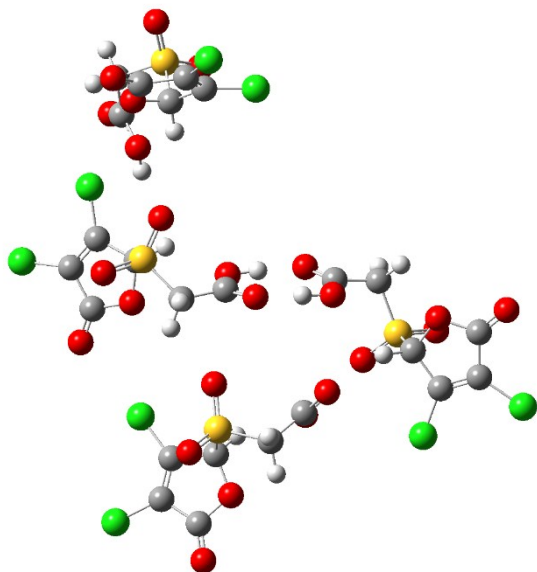

H-bonded tetramer which is realized in polymorph **1a**.

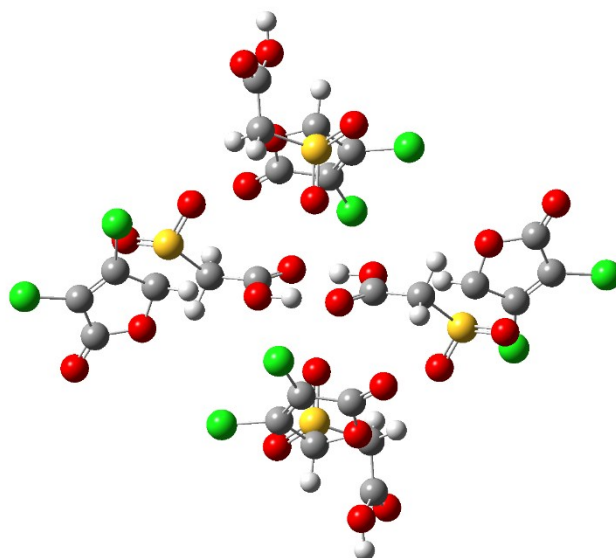

“Lp...synthon”-type tetramer conditionally separated in the crystalline structure of polymorph **1b**.

**Figure S2.** Single point DFT calculations.

- 1) Single point molecule pair interaction energies (PBE0, 6-31G(d,p) level with BSSE corrections) for the molecular pair: “up” and “left” molecules, “up” and “right” molecules (see fig. 4)

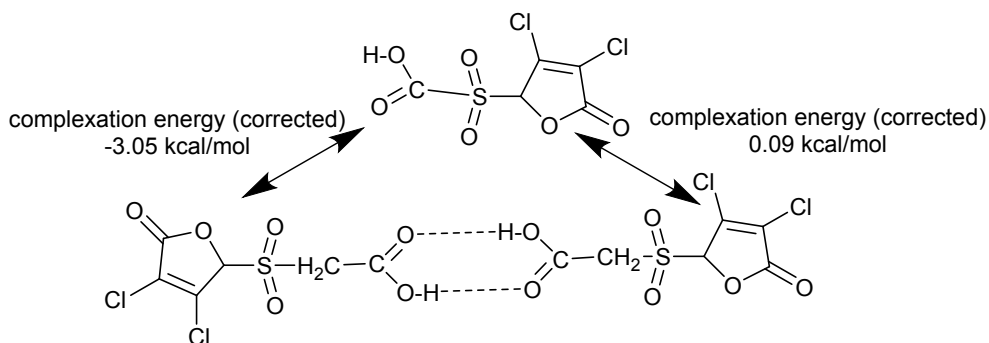

- 2) Single point interaction energies (PBE0, 6-31G(d,p) level with BSSE corrections) for the model system: acetic acid dimer + DMSO.

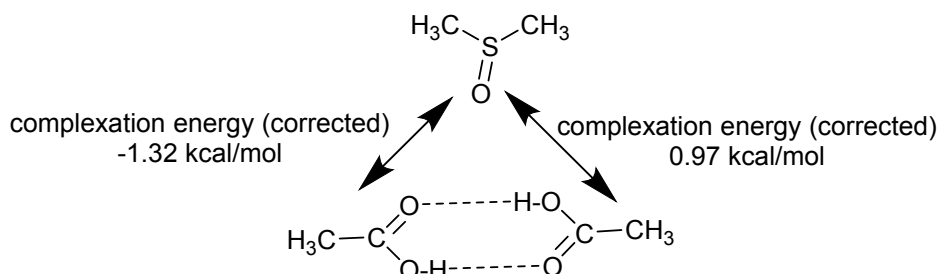

**Table S1.** The change in geometric parameters of hydrogen-bond fragments of the molecule in the series of calculated associates: dimer, H-bonded tetramer, tetramer “lp...synthon”-type.

|                         | d, O-H, Å | d, H...O, Å | d, O...O, Å | d, C=O, Å | d, C-O, Å |
|-------------------------|-----------|-------------|-------------|-----------|-----------|
| Dimer                   | 1.01      | 1.57        | 2.58        | 1.22      | 1.31      |
| H-bonded tetramer       | 1.01      | 1.57        | 2.59        | 1.22      | 1.30      |
| Tetramer «lp...synthon» | 1.04      | 1.51        | 2.55        | 1.24      | 1.31      |

**Table S2.** CCDC search data.

Parameter Values for Query

| Refcode  | $\angle X=O...Cg, ^\circ$ | H...O, Å | O...Cg, Å | X  |
|----------|---------------------------|----------|-----------|----|
| ACEDAC20 | 132,106                   | 1,802    | 2,625     | C  |
| ACETUA   | 126,658                   | 1,703    | 2,79      | N  |
| AKILAH   | 115,854                   | 1,83     | 2,968     | C  |
| AMALOQ   | 123,833                   | 1,921    | 2,885     | C  |
| BANPOW   | 116,005                   | 1,743    | 2,906     | Cl |
| BAQLUD   | 148,818                   | 1,859    | 3,113     | N  |
| BIFQIR   | 137,757                   | 1,564    | 2,758     | C  |
| BIPJUF   | 148,726                   | 1,675    | 3,115     | N  |
| CUYKUC   | 150,3                     | 1,752    | 2,938     | N  |
| DAWRUR   | 140,673                   | 1,897    | 2,944     | C  |
| DUGBEN   | 173,773                   | 1,74     | 2,844     | C  |
| EWELOH   | 158,635                   | 1,794    | 3,193     | C  |
| FOSBUL   | 111,023                   | 1,823    | 2,733     | Cl |
| FUHDES   | 114,52                    | 1,797    | 2,768     | N  |
| GAPPUK   | 125,509                   | 1,864    | 2,909     | N  |
| GENMIW   | 149,563                   | 1,729    | 2,877     | C  |
| GENMOC   | 154,111                   | 1,564    | 2,833     | C  |
| GUGCUG   | 111,188                   | 1,766    | 2,724     | C  |
| HAWKAR   | 124,357                   | 1,786    | 2,957     | Cl |
| HEWWIQ   | 118,173                   | 1,842    | 2,83      | N  |
| HIBHIJ   | 156,497                   | 1,675    | 2,847     | N  |
| HOQXER   | 129,033                   | 1,701    | 2,777     | C  |
| HUFQUV01 | 126,668                   | 1,825    | 2,686     | Cl |
| ICOZOR01 | 171,179                   | 1,851    | 2,883     | N  |
| IZALOK   | 124,354                   | 1,825    | 3,149     | N  |
| JESYIS   | 146,078                   | 1,777    | 2,81      | C  |
| JESYIS   | 148,301                   | 1,804    | 2,821     | C  |
| KANCEI   | 124,187                   | 1,764    | 2,701     | S  |
| KEHSIC   | 122,932                   | 1,748    | 2,803     | C  |
| OFMAW01  | 110,513                   | 1,837    | 2,99      | S  |
| LONKII   | 126,223                   | 1,792    | 3,213     | C  |

|          |         |       |       |   |
|----------|---------|-------|-------|---|
| MALNAC02 | 128,605 | 1,722 | 2,747 | C |
| NEDNOZ   | 131,749 | 1,573 | 2,845 | C |
| NIPBAR   | 130,955 | 1,839 | 2,718 | C |
| ODUSEM   | 149,621 | 1,816 | 3,018 | C |
| OSETEN   | 130,899 | 1,836 | 2,856 | C |
| POBTEF   | 128,948 | 1,45  | 2,801 | N |
| POXZOS   | 123,233 | 1,731 | 2,927 | C |
| REHMEW   | 159,185 | 1,424 | 3,109 | N |
| RUFMOW   | 122,569 | 1,804 | 3,051 | C |
| SAGZOR   | 136,956 | 1,729 | 2,739 | N |
| SIGBEP   | 128,893 | 1,719 | 3,105 | C |
| SIJKIG   | 120,974 | 1,83  | 2,777 | C |
| SOZGEV   | 146,155 | 1,636 | 2,891 | N |
| TIBGIV   | 119,998 | 1,843 | 2,861 | N |
| UNEBOG   | 122,043 | 1,668 | 2,979 | C |
| URILUD   | 134,125 | 1,778 | 2,835 | N |
| VATLAE   | 144,784 | 1,741 | 2,991 | C |
| VUWKUU   | 113,23  | 1,825 | 2,91  | N |
| WUTJUR   | 133,631 | 1,734 | 2,868 | S |
| XEGLOK   | 141,262 | 1,741 | 2,695 | N |
| YUVMUY   | 110,04  | 1,817 | 3,038 | C |
